# Supplementary material for: Association of change in alcohol consumption with cardiovascular disease and mortality among initial nondrinkers
Source: PubMed Central journal article supplement (PMC7414908; doi:10.1038/s41598-020-70304-7), 2020-08-07

Association of Change in Alcohol Consumption with Cardiovascular Disease and Mortality  
Among Initial Nondrinkers

Jun Young Chang, MD<sup>1\*</sup>; Seulggie Choi, MD<sup>2\*</sup>; Sang Min Park, MD PhD MPH<sup>2</sup>

<sup>1</sup>Department of Neurology, Asan Medical Center, Seoul, Republic of Korea

<sup>2</sup>Department of Biomedical Sciences, Seoul National University Graduate School, Seoul  
Republic of Korea

Supplementary Table 1. Descriptive characteristics of the study population according to alcohol consumption initiation.

| <b>Alcohol intake during the second medical checkup (drinks per day)</b> |               |                                              |                         |                    |
|--------------------------------------------------------------------------|---------------|----------------------------------------------|-------------------------|--------------------|
|                                                                          | <b>Total</b>  | <b>Maintained<br/>nondrinking<br/>status</b> | <b>Started drinking</b> | <b>P<br/>value</b> |
| Number of participants (%)                                               | 112,403       | 96,716 (86.0)                                | 15687 (14.0)            |                    |
| Age, years, mean (SD)                                                    | 58.7 (8.5)    | 59.0 (8.6)                                   | 56.6 (7.7)              | <0.01              |
| Sex, n (%)                                                               |               |                                              |                         |                    |
| Men                                                                      | 40,035 (35.6) | 28,994 (30.0)                                | 11041 (70.4)            | <0.01              |
| Women                                                                    | 72,368 (64.4) | 67,722 (70.0)                                | 4646 (29.6)             |                    |
| Household income, quartiles, n (%)                                       |               |                                              |                         | <0.01              |
| 1st (highest)                                                            | 37,640 (33.5) | 31,672 (32.8)                                | 5968 (38.0)             |                    |
| 2nd                                                                      | 32,879 (29.3) | 28,277 (29.2)                                | 4602 (29.3)             |                    |
| 3rd                                                                      | 24,482 (21.8) | 21,356 (22.1)                                | 3126 (19.9)             |                    |
| 4th (lowest)                                                             | 17,402 (15.5) | 15,411 (15.9)                                | 1991 (12.7)             |                    |
| Smoking, n (%)                                                           |               |                                              |                         |                    |
| Never smoker                                                             | 89,331 (79.5) | 81,139 (83.9)                                | 8192 (52.2)             | <0.01              |
| Past smoker                                                              | 12,538 (11.2) | 8,503 (8.8)                                  | 4035 (25.7)             |                    |
| Current smoker                                                           | 10,534 (9.4)  | 7,074 (7.3)                                  | 3460 (22.1)             |                    |
| Physical activity, times per week, n (%)                                 |               |                                              |                         | <0.01              |
| 0                                                                        | 57,150 (50.8) | 51,556 (53.3)                                | 5594 (35.7)             |                    |
| 1 or 2                                                                   | 32,126 (28.6) | 26,032 (26.9)                                | 6094 (38.9)             |                    |
| 3 or 4                                                                   | 16,690 (14.9) | 13,782 (14.3)                                | 2908 (18.5)             |                    |
| ≥5                                                                       | 6,437 (5.7)   | 5,346 (5.5)                                  | 1091 (7.0)              |                    |
| Body mass index, kg/m <sup>2</sup> , mean (SD)                           | 23.7 (2.9)    | 23.7 (2.9)                                   | 23.9 (2.8)              | <0.01              |
| Systolic blood pressure, mmHg, mean (SD)                                 | 123.3 (15.1)  | 123.2 (15.2)                                 | 124.1 (14.7)            | <0.01              |
| Fasting serum glucose, mg/dL, mean (SD)                                  | 98.3 (22.6)   | 98.0 (22.3)                                  | 100.3 (24.1)            | <0.01              |
| Total cholesterol, mg/dL, mean (SD)                                      | 202.5 (37.1)  | 202.8 (37.2)                                 | 200.4 (36.2)            | <0.01              |
| Charlson comorbidity index, n (%)                                        |               |                                              |                         | <0.01              |
| 0                                                                        | 24,261 (21.6) | 20,096 (20.8)                                | 4165 (26.6)             |                    |
| 1                                                                        | 33,927 (30.2) | 28,954 (29.9)                                | 4973 (31.7)             |                    |
| 2                                                                        | 26,300 (23.4) | 22,840 (23.6)                                | 3460 (22.1)             |                    |
| ≥3                                                                       | 27,915 (24.8) | 24,826 (25.7)                                | 3089 (19.7)             |                    |

Supplementary Figure 1. Flow diagram of the study subjects

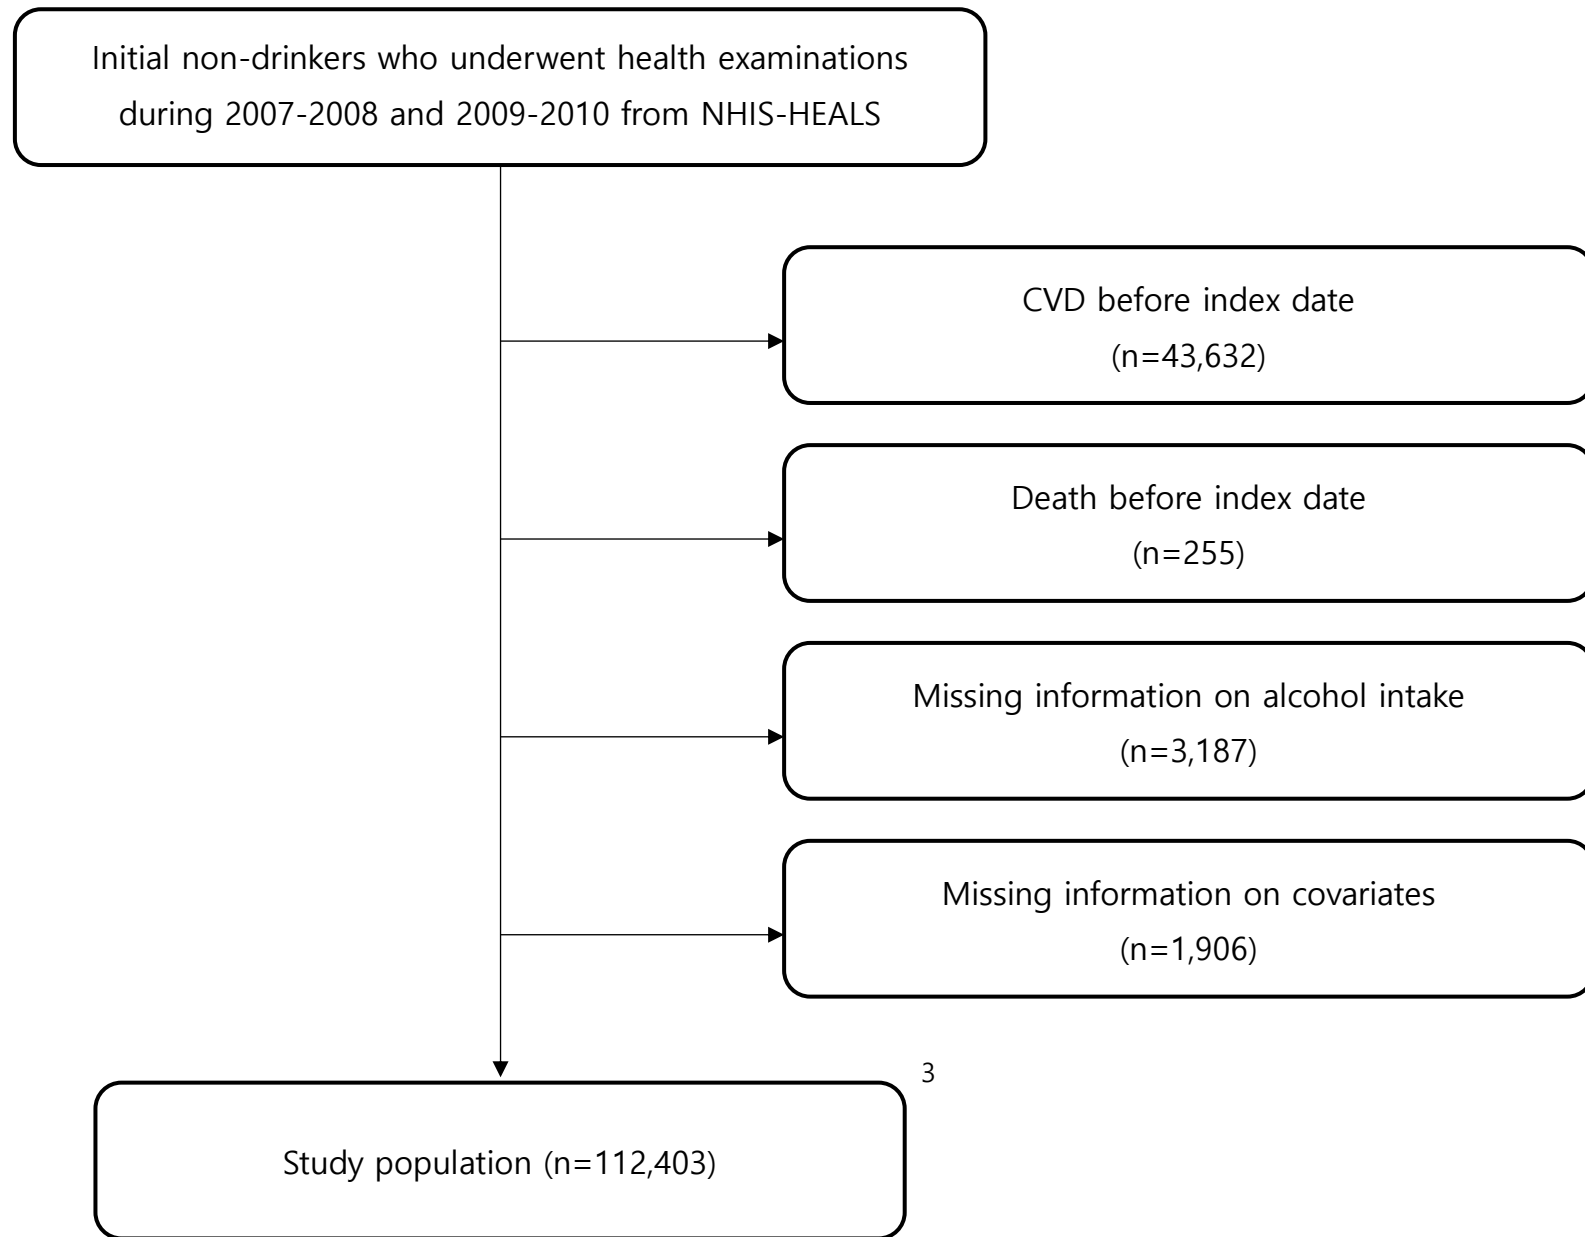

Supplement: 41598_2020_70304_MOESM1_ESM.pdf [file 41598_2020_70304_MOESM1_ESM.pdf]
